# Supplementary material
Source: HighWire-hosted journal article supplement (http://bmjleader.bmj.com/highwire/filestream/3308/field_highwire_adjunct_files/0/leader-2023-000935supp001_data_supplement.pdf)
Supplement: leader-2023-000935supp001_data_supplement.pdf [file leader-2023-000935supp001_data_supplement.pdf]

### Appendix. Psychological Safety in the Perioperative Environment: Survey Questions

1. If I made a mistake, I would feel safe speaking up to members in this department  
Likert 1-Strongly disagree, 5-Strongly agree
2. I am able to bring up problems and tough issues with members in this department  
Likert 1-Strongly disagree, 5-Strongly agree
3. Members of this department would never reject others for being different.  
Likert 1-Strongly disagree, 5-Strongly agree
4. Members of this department encourage and support me to take on new tasks or to learn how to do things I have never done before.  
Likert 1-Strongly disagree, 5-Strongly agree
5. If I had a question or was unsure of something in relation to my role at work, I could ask members of this department  
Likert 1-Strongly disagree, 5-Strongly agree
6. If I had a problem with the perioperative team (operating room, preop clinic, PACU), I could depend on members of this department to be my advocate  
Likert 1-Strongly disagree, 5-Strongly agree
7. If I speak up/voice my opinion, I know that my input is valued by members of this department  
Likert 1-Strongly disagree, 5-Strongly agree
8. I plan to leave my current job within the next 12-months  
Likert 1-Strongly disagree, 5-Strongly agree
9. How long have you worked in this department?
  - a. 1-5 years
  - b. 6-10 years
  - c. >10 years
10. What is your gender?
  - a. Woman
  - b. Man
  - c. Non-binary
  - d. Prefer not to disclose
